# Supplementary material
Source: PubMed Central journal article supplement (PMC9474604)

**Table S1.** Servings per day of individual dietary components in extreme quintiles of healthy and unhealthy plant-based diet score quintiles

| Characteristic<br>(servings/day) | Healthy plant-based diet index (hPDI) |      |                     |      |       | Unhealthy plant-based diet index (uPDI) |      |                     |      |       |
|----------------------------------|---------------------------------------|------|---------------------|------|-------|-----------------------------------------|------|---------------------|------|-------|
|                                  | Lowest<br>quintile                    | SD   | Highest<br>quintile | SD   | Ratio | Lowest<br>quintile                      | SD   | Highest<br>quintile | SD   | Ratio |
| whole grains                     | 1.11                                  | 1.13 | 2.15                | 1.68 | 1.95  | 2.30                                    | 1.59 | 0.93                | 1.06 | 0.40  |
| fruits                           | 1.12                                  | 0.94 | 2.20                | 1.58 | 1.97  | 2.24                                    | 1.46 | 0.97                | 0.88 | 0.43  |
| vegetables                       | 2.56                                  | 1.50 | 4.09                | 2.44 | 1.60  | 4.64                                    | 2.19 | 1.92                | 1.24 | 0.41  |
| nuts                             | 0.43                                  | 0.69 | 0.57                | 0.80 | 1.32  | 0.75                                    | 0.90 | 0.29                | 0.50 | 0.39  |
| legumes                          | 0.37                                  | 0.29 | 0.53                | 0.48 | 1.44  | 0.60                                    | 0.44 | 0.28                | 0.24 | 0.46  |
| vegetable oils                   | 0.16                                  | 0.25 | 0.35                | 0.49 | 2.25  | 0.40                                    | 0.47 | 0.12                | 0.22 | 0.30  |
| tea and coffee                   | 2.09                                  | 1.87 | 2.49                | 2.00 | 1.19  | 3.05                                    | 2.03 | 1.64                | 1.66 | 0.54  |
| fruit juice                      | 0.94                                  | 0.88 | 0.61                | 0.78 | 0.65  | 0.76                                    | 0.91 | 0.83                | 0.85 | 1.09  |
| refined grains                   | 2.12                                  | 1.39 | 1.02                | 0.92 | 0.48  | 1.38                                    | 1.10 | 1.68                | 1.32 | 1.22  |
| potatoes                         | 0.80                                  | 0.48 | 0.37                | 0.31 | 0.46  | 0.54                                    | 0.41 | 0.59                | 0.45 | 1.09  |
| sugar-sweetened<br>beverages     | 0.72                                  | 0.82 | 0.11                | 0.31 | 0.15  | 0.19                                    | 0.39 | 0.59                | 0.78 | 3.06  |
| sweets and<br>desserts           | 2.16                                  | 1.70 | 0.74                | 0.88 | 0.34  | 1.26                                    | 1.37 | 1.62                | 1.51 | 1.29  |
| animal fat                       | 0.58                                  | 0.91 | 0.10                | 0.35 | 0.16  | 0.48                                    | 0.83 | 0.17                | 0.48 | 0.35  |
| dairy                            | 2.53                                  | 1.69 | 1.48                | 1.18 | 0.58  | 2.55                                    | 1.65 | 1.47                | 1.30 | 0.58  |
| eggs                             | 0.48                                  | 0.47 | 0.17                | 0.31 | 0.36  | 0.46                                    | 0.50 | 0.22                | 0.34 | 0.48  |
| fish                             | 0.37                                  | 0.28 | 0.42                | 0.41 | 1.15  | 0.55                                    | 0.38 | 0.25                | 0.23 | 0.44  |
| meat                             | 1.85                                  | 0.84 | 0.86                | 0.52 | 0.46  | 1.60                                    | 0.90 | 1.18                | 0.69 | 0.74  |
| miscellaneous<br>animal products | 0.42                                  | 1.34 | 0.21                | 1.11 | 0.50  | 0.44                                    | 1.33 | 0.25                | 1.25 | 0.58  |

Abbreviations: SD = standard deviation

**Table S2.** Multivariable-adjusted association of individual components with incident erectile dysfunction.

| PDI | hPDI | uPDI | Food groups    | Quintile of servings per day |              |                     |                     |                     | P for trend         |        |
|-----|------|------|----------------|------------------------------|--------------|---------------------|---------------------|---------------------|---------------------|--------|
|     |      |      |                | 1                            | 2            | 3                   | 4                   | 5                   |                     |        |
| +   | +    | -    | whole grains   | mean                         | 0.28         | 0.75                | 1.23                | 1.92                | 3.76                | 0.1    |
|     |      |      |                | (sd)                         | (0.14)       | (0.14)              | (0.15)              | (0.28)              | (1.28)              |        |
|     |      |      |                | HR<br>(95% CI)               | 1<br>(index) | 1.03<br>(0.96-1.09) | 1.09<br>(1.02-1.16) | 1.06<br>(0.99-1.13) | 1.05<br>(0.98-1.13) |        |
| +   | +    | -    | fruits         | mean                         | 0.38         | 0.89                | 1.38                | 1.99                | 3.54                | 0.0003 |
|     |      |      |                | (sd)                         | (0.17)       | (0.14)              | (0.15)              | (0.22)              | (1.32)              |        |
|     |      |      |                | HR<br>(95% CI)               | 1<br>(index) | 1.00<br>(0.93-1.06) | 0.95<br>(0.89-1.01) | 0.91<br>(0.85-0.98) | 0.90<br>(0.84-0.97) |        |
| +   | +    | -    | vegetables     | mean                         | 1.23         | 2.07                | 2.80                | 3.72                | 5.93                | 0.6    |
|     |      |      |                | (sd)                         | (0.35)       | (0.20)              | (0.22)              | (0.33)              | (1.87)              |        |
|     |      |      |                | HR<br>(95% CI)               | 1<br>(index) | 1.03<br>(0.97-1.10) | 1.0<br>(0.93-1.07)  | 0.97<br>(0.91-1.05) | 1.02<br>(0.94-1.10) |        |
| +   | +    | -    | nuts           | mean                         | 0.03         | 0.14                | 0.27                | 0.53                | 1.40                | 0.5    |
|     |      |      |                | (sd)                         | (0.03)       | (0.03)              | (0.19)              | (0.10)              | (0.90)              |        |
|     |      |      |                | HR<br>(95% CI)               | 1<br>(index) | 1.07<br>(1.00-1.14) | 1.02<br>(0.95-1.08) | 1.02<br>(0.96-1.09) | 1.05<br>(0.98-1.12) |        |
| +   | +    | -    | legumes        | mean                         | 0.13         | 0.24                | 0.34                | 0.52                | 0.96                | 0.0009 |
|     |      |      |                | (sd)                         | (0.05)       | (0.03)              | (0.03)              | (0.07)              | (0.42)              |        |
|     |      |      |                | HR<br>(95% CI)               | 1<br>(index) | 1.02<br>(0.96-1.08) | 0.97<br>(0.91-1.03) | 0.95<br>(0.89-1.01) | 0.90<br>(0.84-0.97) |        |
| +   | +    | -    | vegetable oils | mean                         | 0 (0)        | 0.05                | 0.13                | 0.34                | 0.80                | 0.5    |
|     |      |      |                | (sd)                         |              | (0.02)              | (0.03)              | (0.08)              | (0.45)              |        |
|     |      |      |                | HR<br>(95% CI)               | 1<br>(index) | 1.03<br>(0.97-1.10) | 1.00<br>(0.93-1.06) | 1.02<br>(0.95-1.09) | 1.02<br>(0.96-1.09) |        |
| +   | +    | -    | tea and coffee | mean                         | 0.18         | 1.07                | 2.15                | 3.04                | 5.19                | 0.002  |
|     |      |      |                | (sd)                         | (0.21)       | (0.22)              | (0.33)              | (0.35)              | (1.16)              |        |
|     |      |      |                | HR<br>(95% CI)               | 1<br>(index) | 1.01<br>(0.95-1.08) | 1.07<br>(1.01-1.14) | 1.09<br>(1.03-1.16) | 1.07<br>(1.01-1.14) |        |
| +   | -    | +    | fruit juice    | mean                         | 0.06         | 0.28                | 0.65                | 1.01                | 1.90                | 0.03   |
|     |      |      |                | (sd)                         | (0.05)       | (0.09)              | (0.13)              | (0.07)              | (0.96)              |        |
|     |      |      |                | HR<br>(95% CI)               | 1<br>(index) | 1.01<br>(0.95-1.07) | 1.00<br>(0.94-1.06) | 0.99<br>(0.93-1.05) | 0.94<br>(0.88-1.00) |        |
| +   | -    | +    | refined grains | mean                         | 0.43         | 0.84                | 1.23                | 1.76                | 3.34                | 0.9    |
|     |      |      |                | (sd)                         | (0.15)       | (0.11)              | (0.12)              | (0.21)              | (1.14)              |        |
|     |      |      |                | HR<br>(95% CI)               | 1<br>(index) | 1.01<br>(0.95-1.07) | 0.98<br>(0.92-1.04) | 1.00<br>(0.93-1.06) | 1.01<br>(0.95-1.08) |        |
| +   | -    | +    | potatoes       | mean                         | 0.14         | 0.31                | 0.48                | 0.67                | 1.15                |        |
|     |      |      |                | (sd)                         | (0.06)       | (0.05)              | (0.05)              | (0.08)              | (0.39)              |        |

|   |   |   |                                 |                |                |                     |                     |                     |                     |        |
|---|---|---|---------------------------------|----------------|----------------|---------------------|---------------------|---------------------|---------------------|--------|
|   |   |   |                                 | HR<br>(95% CI) | 1<br>(index)   | 1.03<br>(0.96-1.09) | 1.05<br>(0.98-1.12) | 1.01<br>(0.94-1.08) | 1.05<br>(0.98-1.12) | 0.4    |
|   |   |   | sugar<br>sweetened<br>beverages | mean<br>(sd)   | 0 (0)          | 0.04<br>(0.02)      | 0.12<br>(0.04)      | 0.35<br>(0.10)      | 1.19<br>(0.75)      |        |
| + | - | + |                                 | HR<br>(95% CI) | 1<br>(index)   | 1.00<br>(0.94-1.06) | 1.00<br>(0.94-1.06) | 0.98<br>(0.92-1.05) | 1.02<br>(0.96-1.09) | 0.5    |
|   |   |   | sweets and<br>desserts          | mean<br>(sd)   | 0.22<br>(0.12) | 0.60<br>(0.11)      | 1.04<br>(0.14)      | 1.65<br>(0.23)      | 3.47<br>(1.51)      |        |
| + | - | + |                                 | HR<br>(95% CI) | 1<br>(index)   | 1.03<br>(0.97-1.10) | 1.02<br>(0.95-1.09) | 1.01<br>(0.95-1.08) | 1.01<br>(0.94-1.09) | 0.9    |
|   |   |   | animal fat                      | mean<br>(sd)   | 0<br>(0)       | 0<br>(0)            | 0.04<br>(0.02)      | 0.17<br>(0.11)      | 1.10<br>(0.87)      |        |
| - | - | - |                                 | HR<br>(95% CI) | 1<br>(index)   | 1.07<br>(0.99-1.14) | 1.05<br>(0.99-1.13) | 1.06<br>(0.99-1.13) | 1.00<br>(0.93-1.07) | 0.9    |
|   |   |   | dairy                           | mean<br>(sd)   | 0.53<br>(0.22) | 1.11<br>(0.14)      | 1.60<br>(0.15)      | 2.33<br>(0.29)      | 4.07<br>(1.29)      |        |
| - | - | - |                                 | HR<br>(95% CI) | 1<br>(index)   | 1.01<br>(0.95-1.08) | 1.06<br>(1.00-1.13) | 1.05<br>(0.98-1.12) | 1.05<br>(0.98-1.12) | 0.08   |
|   |   |   | eggs                            | mean<br>(sd)   | 0.02<br>(0.02) | 0.09<br>(0.02)      | 0.23<br>(0.09)      | 0.40<br>(0.03)      | 1.0<br>(0.58)       |        |
| - | - | - |                                 | HR<br>(95% CI) | 1<br>(index)   | 1.04<br>(0.98-1.11) | 1.09<br>(1.03-1.16) | 1.07<br>(1.00-1.14) | 1.06<br>(0.99-1.14) | 0.07   |
|   |   |   | fish                            | mean<br>(sd)   | 0.09<br>(0.05) | 0.21<br>(0.03)      | 0.32<br>(0.03)      | 0.47<br>(0.06)      | 0.87<br>(0.35)      |        |
| - | - | - |                                 | HR<br>(95% CI) | 1<br>(index)   | 0.98<br>(0.92-1.04) | 0.95<br>(0.89-1.01) | 0.96<br>(0.90-1.02) | 0.94<br>(0.88-1.01) | 0.2    |
|   |   |   | meat                            | mean<br>(sd)   | 0.52<br>(0.19) | 0.91<br>(0.09)      | 1.22<br>(0.10)      | 1.62<br>(0.14)      | 2.47<br>(0.71)      |        |
| - | - | - |                                 | HR<br>(95% CI) | 1<br>(index)   | 1.09<br>(1.02-1.16) | 1.09<br>(1.02-1.17) | 1.13<br>(1.06-1.21) | 1.16<br>(1.08-1.25) | 0.0001 |
|   |   |   | misc animal<br>products         | mean<br>(sd)   | 0 (0)          | 0.05<br>(0.02)      | 0.11<br>(0.01)      | 0.17<br>(0.03)      | 1.46<br>(2.35)      |        |
| - | - | - |                                 | HR<br>(95% CI) | 1<br>(index)   | 1.04<br>(0.97-1.1)  | 1.03<br>(0.96-1.10) | 1.06<br>(0.99-1.13) | 1.01<br>(0.95-1.08) | 0.7    |

Positive (+) and reverse (-) scoring for each food group according to index is shown in left columns. Abbreviations: CI = confidence interval; HR = hazard ratio; SD = standard deviation; PDI = plant-based diet index; hPDI = healthy plant-based diet index; uPDI = unhealthy plant-based diet index;

**Figure S1.** Study flowchart.

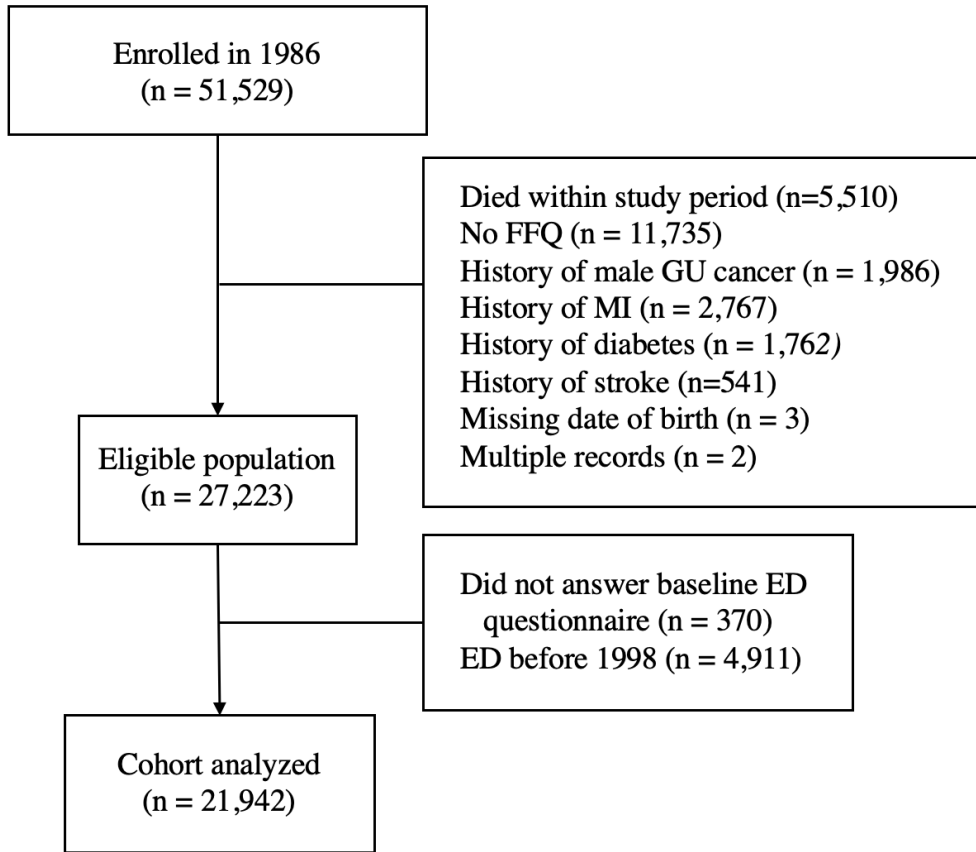

Abbreviations: ED = erectile dysfunction; FFQ = Food frequency questionnaire; GU = genitourinary; MI = myocardial infarction

**Figure S2.** Multivariable-adjusted association of plant-based diet indices with erectile dysfunction among pooled analytic study population.

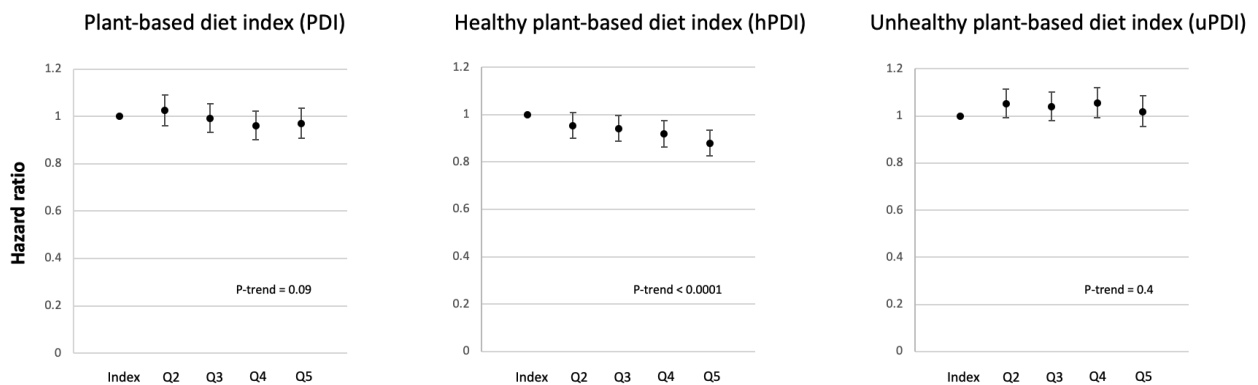

Supplement: NIHMS1827108-supplement-1.pdf [file NIHMS1827108-supplement-1.pdf]
